# Supplementary material for: Die NEP-Skala – hinter den (deutschen) Kulissen des Umweltbewusstseins
Source: Atypon-hosted journal article supplement (doi:10.1026/0012-1924/a000202), 2018-03-02
Supplement: 0012-1924_a000202_esm1.pdf [file 0012-1924_a000202_esm1.pdf]

*Table 3. Englischsprachige Originalversion der NEP-Items und deutsche Übersetzung mit Zuordnung zu den postulierten inhaltlichen Facetten (Dunlap et al., 2000)*

| <b>Item</b> | <b>Englisches Original</b>                                                                          | <b>Deutsche Übersetzung</b>                                                                                          | <b>Inhaltliche Facette</b>         |
|-------------|-----------------------------------------------------------------------------------------------------|----------------------------------------------------------------------------------------------------------------------|------------------------------------|
| <b>1</b>    | We are approaching the limit of the number of people the earth can support.                         | Wir nähern uns dem Limit der Bevölkerungszahl, die die Erde bewältigen kann.                                         | <i>limits of growth</i>            |
| <b>2</b>    | Humans have the right to modify the natural environment to suit their needs.                        | Die Menschen haben das Recht ihre natürliche Umwelt zu verändern, um sie an ihre Bedürfnisse anzupassen.             | <i>antianthropocentrism</i>        |
| <b>3</b>    | When humans interfere with nature it often produces disastrous consequences.                        | Wenn die Menschen sich in die Natur einmischen, hat das oft katastrophale Konsequenzen.                              | <i>fragility of balance</i>        |
| <b>4</b>    | Human ingenuity will insure that we do NOT make the earth unlivable.                                | Der menschliche Einfallsreichtum wird dafür sorgen, dass wir die Erde NICHT unbewohnbar machen.                      | <i>rejection of exemptionalism</i> |
| <b>5</b>    | Humans are severely abusing the environment.                                                        | Die Menschen missbrauchen die Umwelt schwer.                                                                         | <i>ecocrisis</i>                   |
| <b>6</b>    | The earth has plenty of natural resources if we just learn how to develop them.                     | Die Erde hat eine Menge natürlicher Ressourcen, wenn wir nur lernen diese zu fördern.                                | <i>limits of growth</i>            |
| <b>7</b>    | Plants and animals have as much right as humans to exist.                                           | Pflanzen und Tiere haben das gleiche Recht zu leben wie Menschen.                                                    | <i>antianthropocentrism</i>        |
| <b>8</b>    | The balance of nature is strong enough to cope with impacts of modern industrial nations.           | Das Gleichgewicht der Natur ist stark genug, um den Einfluss der modernen Industrienationen zu bewältigen.           | <i>fragility of balance</i>        |
| <b>9</b>    | Despite our special abilities humans are still subject to the laws of nature.                       | Abgesehen von unseren speziellen Fähigkeiten sind wir Menschen immer noch den Naturgesetzen unterworfen.             | <i>rejection of exemptionalism</i> |
| <b>10</b>   | The so-called „ecological crisis“ facing humankind has been greatly exaggerated.                    | Die so genannte „Umweltkrise“ mit der die Menschheit konfrontiert ist, wird völlig übertrieben.                      | <i>ecocrisis</i>                   |
| <b>11</b>   | The earth is like a spaceship with very limited room and resources.                                 | Die Erde ist wie ein Raumschiff mit wenig Platz und wenig Ressourcen.                                                | <i>limits of growth</i>            |
| <b>12</b>   | Humans were meant to rule over the rest of nature.                                                  | Menschen sind dazu geboren, über den Rest der Natur zu herrschen.                                                    | <i>antianthropocentrism</i>        |
| <b>13</b>   | The balance of nature is very delicate and easily upset.                                            | Das Gleichgewicht der Natur ist sehr empfindlich und leicht zu stören.                                               | <i>fragility of balance</i>        |
| <b>14</b>   | Humans will eventually learn enough about how nature works to be able to control it.                | Die Menschen werden möglicherweise genug darüber lernen, wie die Natur funktioniert, um sie kontrollieren zu können. | <i>rejection of exemptionalism</i> |
| <b>15</b>   | If things continue on their present course, we will soon experience a major ecological catastrophe. | Wenn die Dinge so weitergehen wie bisher, werden wir bald eine große Umweltkatastrophe erleben.                      | <i>ecocrisis</i>                   |

*Anmerkung:* Instruiert wurde die Skala mit „Nachfolgend finden Sie einige Aussagen zur Beziehung zwischen Mensch und Umwelt. Geben Sie bitte für jede Aussage an, in welchem Maße Sie mit ihr übereinstimmen.“
