# Supplementary material for: Die NEP-Skala – hinter den (deutschen) Kulissen des Umweltbewusstseins
Source: Atypon-hosted journal article supplement (doi:10.1026/0012-1924/a000202), 2018-03-02
Supplement: 0012-1924_a000202_esm2.pdf [file 0012-1924_a000202_esm2.pdf]

Tabelle 4. Mittelwerte, Standardabweichungen und bivariate Korrelationen der deutschsprachigen NEP-Items

| Item                                                       | M    | SD   | bivariate Korrelation (Pearson) |       |              |              |        |              |              |        |              |             |              |              |              |              |
|------------------------------------------------------------|------|------|---------------------------------|-------|--------------|--------------|--------|--------------|--------------|--------|--------------|-------------|--------------|--------------|--------------|--------------|
|                                                            |      |      | 2                               | 3     | 4            | 5            | 6      | 7            | 8            | 9      | 10           | 11          | 12           | 13           | 14           | 15           |
| 1 Limit der Bevölkerungszahl                               | 3.99 | 1.58 | .13**                           | .29** | .13**        | <b>.33**</b> | .02    | .21*         | .25**        | .12**  | .25**        | <b>.39*</b> | .13**        | <b>.34**</b> | .16**        | <b>.40**</b> |
| 2 <i>Recht, Umwelt<br/>Bedürfnissen<br/>anzupassen</i>     | 4.10 | 1.28 | -                               | .29** | <b>.38**</b> | <b>.31**</b> | .17**  | <b>.32**</b> | <b>.30**</b> | .09*   | <b>.31**</b> | .16**       | <b>.47**</b> | .26**        | <b>.40**</b> | <b>.32**</b> |
| 3 Einmischen in Natur<br>katastrophale<br>Konsequenzen     | 4.50 | 1.29 |                                 | -     | .26**        | <b>.50**</b> | -.03   | <b>.33**</b> | <b>.30**</b> | .25**  | <b>.31**</b> | .22**       | .26**        | <b>.38**</b> | .29**        | <b>.45**</b> |
| 4 <i>Erde NICHT<br/>unbewohnbar</i>                        | 3.39 | 1.43 |                                 |       | -            | .24**        | .22**  | .17**        | <b>.40**</b> | -.04   | <b>.32**</b> | .18**       | <b>.31**</b> | .22**        | <b>.41**</b> | <b>.33**</b> |
| 5 Menschen miss-<br>brauchen Umwelt                        | 4.66 | 1.22 |                                 |       |              | -            | -.12** | <b>.36**</b> | <b>.43**</b> | .27**  | <b>.41**</b> | .22**       | <b>.31**</b> | <b>.40**</b> | .24**        | <b>.55**</b> |
| 6 <i>Erde: Menge natür-<br/>licher Ressourcen</i>          | 2.51 | 1.23 |                                 |       |              |              | -      | -.08         | .13**        | -.16** | .10*         | .16**       | .12**        | -.06         | .23**        | .00          |
| 7 Pflanzen, Tiere<br>gleiches Recht wie<br>Menschen        | 4.90 | 1.31 |                                 |       |              |              |        | -            | .16**        | .29**  | .21**        | .15**       | <b>.40**</b> | .29**        | .24**        | <b>.31**</b> |
| 8 <i>Gleichgewicht der<br/>Natur stark genug</i>           | 4.80 | 1.12 |                                 |       |              |              |        |              | -            | .10*   | <b>.47**</b> | .17**       | <b>.30**</b> | <b>.36**</b> | <b>.35**</b> | <b>.49**</b> |
| 9 Menschen Natur-<br>gesetzen unterworfen                  | 5.24 | 1.03 |                                 |       |              |              |        |              |              | -      | .08          | .10*        | .14**        | .22**        | .07          | .22**        |
| 10 <i>“Umweltkrise” völlig<br/>übertrieben</i>             | 4.30 | 1.50 |                                 |       |              |              |        |              |              |        | -            | .18**       | <b>.33**</b> | <b>.32**</b> | .28*         | <b>.58**</b> |
| 11 Erde ist wie ein<br>Raumschiff                          | 3.21 | 1.45 |                                 |       |              |              |        |              |              |        |              | -           | .14**        | <b>.31**</b> | .15**        | <b>.34**</b> |
| 12 <i>Geboren, über Natur<br/>zu herrschen</i>             | 5.10 | 1.24 |                                 |       |              |              |        |              |              |        |              |             | -            | .25**        | <b>.39**</b> | <b>.32**</b> |
| 13 Naturgleichgewicht<br>sehr empfindlich                  | 4.61 | 1.30 |                                 |       |              |              |        |              |              |        |              |             |              | -            | .19**        | <b>.52**</b> |
| 14 <i>Menschen werden<br/>Natur kontrollieren</i>          | 4.10 | 1.39 |                                 |       |              |              |        |              |              |        |              |             |              |              | -            | .27**        |
| 15 Wenn Dinge so<br>weitergehen große<br>Umweltkatastrophe | 4.12 | 1.42 |                                 |       |              |              |        |              |              |        |              |             |              |              |              | -            |

Anmerkungen: Antwortskala von 1 = *stimme nicht zu* bis 6 = *stimme völlig zu*; kursiv gedruckte Items wurden rekodiert; höhere Werte entsprechen somit einer proökologischen NEP-Zustimmung; Korrelationen über .30 fett gedruckt; \* $p < .05$ , \*\* $p < .001$ .
