# Supplementary material for: Die NEP-Skala – hinter den (deutschen) Kulissen des Umweltbewusstseins
Source: Atypon-hosted journal article supplement (doi:10.1026/0012-1924/a000202), 2018-03-02
Supplement: 0012-1924_a000202_esm3.pdf [file 0012-1924_a000202_esm3.pdf]

Table 5. Mustermatrix der Faktorenanalyse mit *Maximum-Likelihood-Methode* und Promax Rotation

|    | Item                                                                                                                      | Facette                            | I          | II         | III         | IV         |
|----|---------------------------------------------------------------------------------------------------------------------------|------------------------------------|------------|------------|-------------|------------|
| 8  | Das Gleichgewicht der Natur ist stark genug, um den Einfluss der modernen Industrienationen zu bewältigen. (R)*           | <i>fragility of balance</i>        | <b>.74</b> | .15        | -.17        | -.10       |
| 15 | Wenn die Dinge so weitergehen wie bisher, werden wir bald eine große Umweltkatastrophe erleben.                           | <i>ecocrisis</i>                   | <b>.71</b> | -.05       | .10         | .14        |
| 10 | Die so genannte "Umweltkrise" mit der die Menschheit konfrontiert ist, wird völlig übertrieben. (R)*                      | <i>ecocrisis</i>                   | <b>.71</b> | .10        | -.09        | -.08       |
| 5  | Die Menschen missbrauchen die Umwelt schwer.                                                                              | <i>ecocrisis</i>                   | <b>.48</b> | .00        | .38         | -.02       |
| 13 | Das Gleichgewicht der Natur ist sehr empfindlich und leicht zu stören.                                                    | <i>fragility of balance</i>        | <b>.39</b> | -.04       | .20         | .20        |
| 2  | Die Menschen haben das Recht ihre natürliche Umwelt zu verändern, um sie an ihre Bedürfnisse anzupassen. (R)*             | <i>antianthropocentrism</i>        | .03        | <b>.63</b> | .11         | .47        |
| 4  | Der menschliche Einfallsreichtum wird dafür sorgen, dass wir die Erde NICHT unbewohnbar machen. (R)*                      | <i>rejection of exemptionalism</i> | .33        | <b>.63</b> | .13         | -.05       |
| 12 | Menschen sind dazu geboren, über den Rest der Natur zu herrschen. (R)*                                                    | <i>antianthropocentrism</i>        | -.02       | <b>.62</b> | .24         | -.06       |
| 14 | Die Menschen werden möglicherweise genug darüber lernen, wie die Natur funktioniert, um sie kontrollieren zu können. (R)* | <i>rejection of exemptionalism</i> | .10        | <b>.58</b> | -.04        | -.01       |
| 7  | Pflanzen und Tiere haben das gleiche Recht zu leben wie Menschen.                                                         | <i>antianthropocentrism</i>        | -.19       | .37        | <b>.59</b>  | .03        |
| 6  | Die Erde hat eine Menge natürlicher Ressourcen, wenn wir nur lernen diese zu fördern. (R)*                                | <i>limits of growth</i>            | -.05       | .42        | <b>-.49</b> | .21        |
| 9  | Abgesehen von unseren speziellen Fähigkeiten sind wir Menschen immer noch den Naturgesetzen unterworfen.                  | <i>rejection of exemptionalism</i> | -.04       | -.02       | <b>.48</b>  | .05        |
| 3  | Wenn die Menschen sich in die Natur einmischen, hat das oft katastrophale Konsequenzen.                                   | <i>fragility of balance</i>        | .27        | .13        | <b>.34</b>  | .08        |
| 11 | Die Erde ist wie ein Raumschiff mit wenig Platz und wenig Ressourcen.                                                     | <i>limits of growth</i>            | -.10       | .01        | -.04        | <b>.81</b> |
| 1  | Wir nähern uns dem Limit der Bevölkerungszahl, die die Erde bewältigen kann.                                              | <i>limits of growth</i>            | .16        | -.11       | .11         | <b>.47</b> |
|    | Erklärte Varianz                                                                                                          |                                    | 32 %       | 11 %       | 9 %         | 7 %        |

Anmerkungen: 8 Iterationen; \*(R): rekodierte Items; Ladung des dem Faktor zugeschriebenen Items fettgedruckt.
