# Supplementary material for: Die NEP-Skala – hinter den (deutschen) Kulissen des Umweltbewusstseins
Source: Atypon-hosted journal article supplement (doi:10.1026/0012-1924/a000202), 2018-03-02
Supplement: 0012-1924_a000202_esm4.pdf [file 0012-1924_a000202_esm4.pdf]

*Tabelle 6. Cronbach's  $\alpha$  und bivariate Korrelationen der vier Faktoren*

| Faktor                                                    | Korrelationen ( $\alpha$ ) |       |       |       |
|-----------------------------------------------------------|----------------------------|-------|-------|-------|
|                                                           | I                          | II    | III   | IV    |
| I    Bewusstsein Ökokrise<br>(Item 5, 8, 10, 13, 15)      | (.80)                      | .52** | .51** | .55** |
| II    Antianthropozentrismus<br>(Item 2, 4, 12, 14)       |                            | (.72) | .23** | .35** |
| III   Gleiche Rechte von<br>Mensch & Natur (Item 3, 7, 9) |                            |       | (.56) | .33** |
| IV    Grenzen von Wachstum/<br>Ressourcen (Item 1, 11)    |                            |       |       | .38** |

*Anmerkung: \*\* $p < .001$ .*
