# Supplementary material for: Die NEP-Skala – hinter den (deutschen) Kulissen des Umweltbewusstseins
Source: Atypon-hosted journal article supplement (doi:10.1026/0012-1924/a000202), 2018-03-02
Supplement: 0012-1924_a000202_esm5.pdf [file 0012-1924_a000202_esm5.pdf]

Faktor 2. Ordnung

Faktoren 1. Ordnung

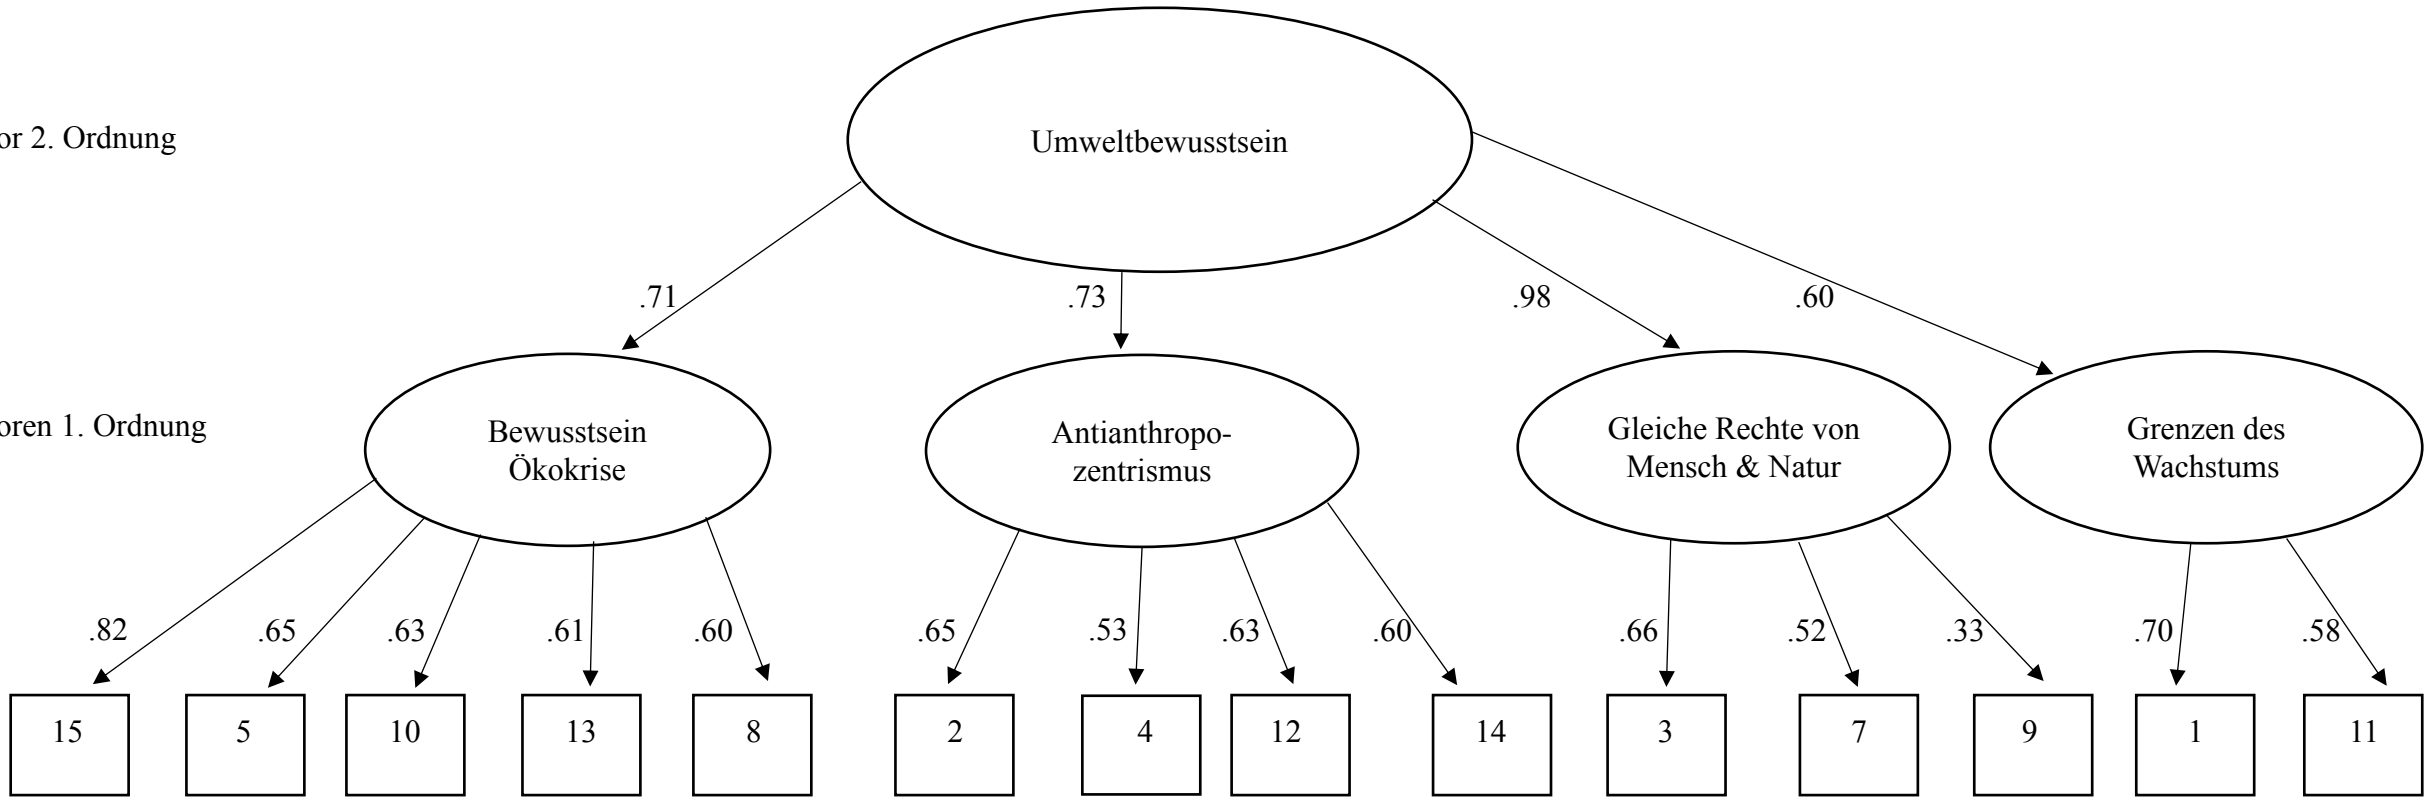

Anmerkungen: Die jeweiligen Ladungen links vom Strich; in den Kästchen: Items nach Dunlap et al., 2000; ohne Item 6.

Abbildung 1. Hierarchisches Modell
