# Supplementary material for: Die NEP-Skala – hinter den (deutschen) Kulissen des Umweltbewusstseins
Source: Atypon-hosted journal article supplement (doi:10.1026/0012-1924/a000202), 2018-03-02
Supplement: 0012-1924_a000202_esm6.pdf [file 0012-1924_a000202_esm6.pdf]

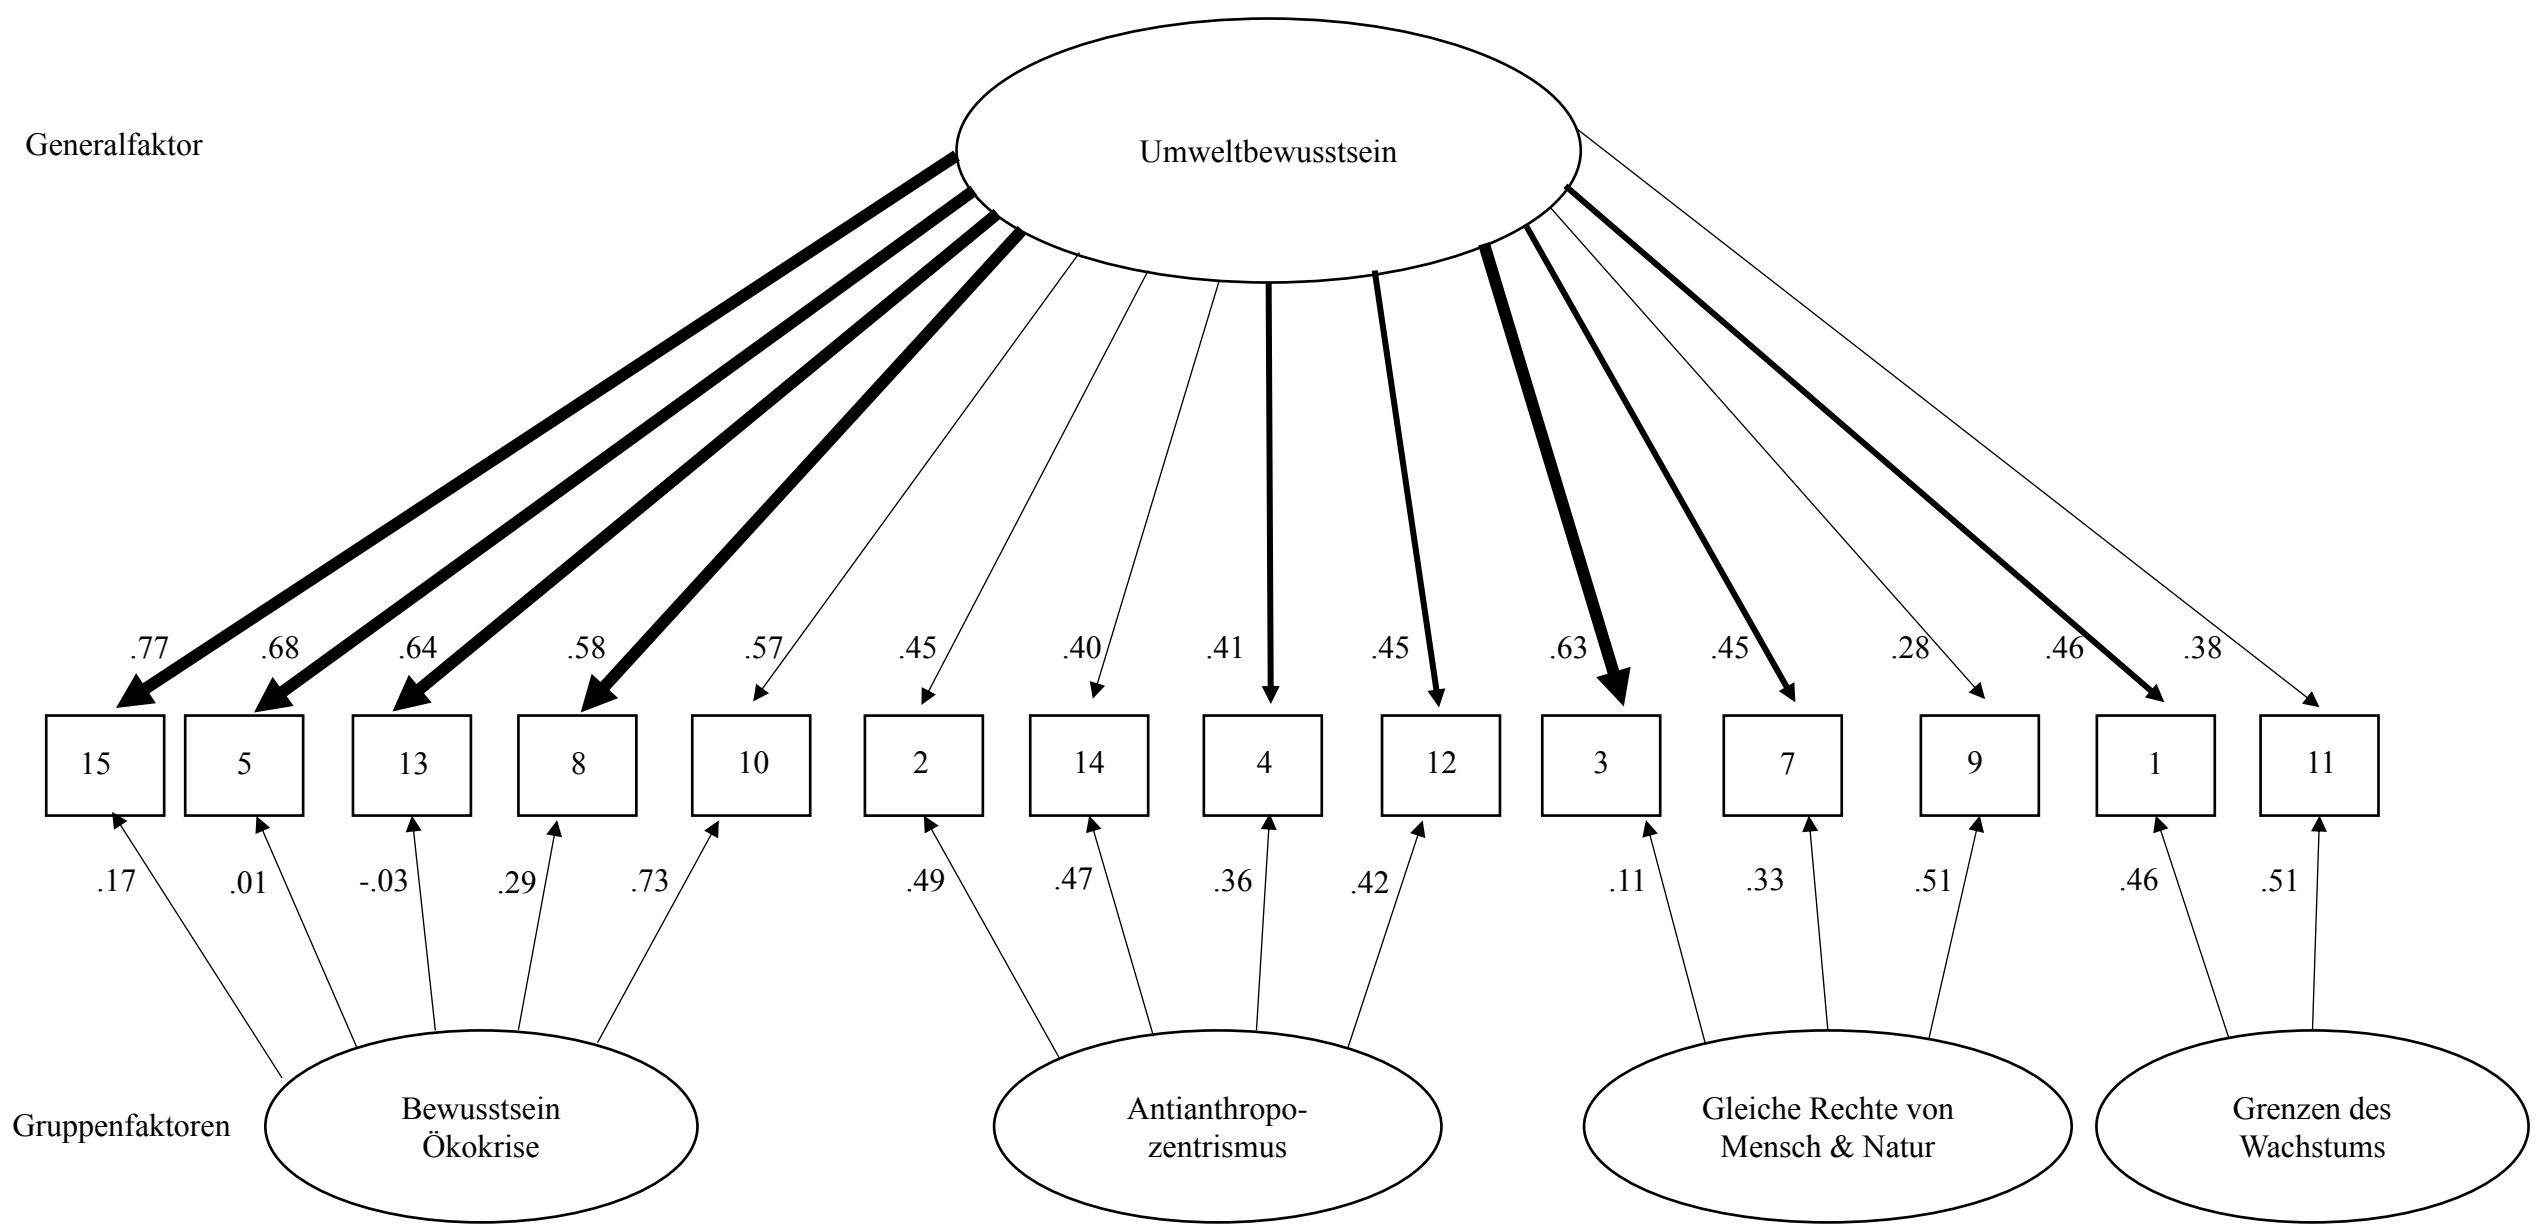

*Anmerkungen:* Die jeweiligen Ladungen links vom Strich; vom Generalfaktor ausgehend, ganz dicke Striche: Items, die hauptsächlich auf den Generalfaktor laden. Etwas dickerer Strich: Items, die etwas mehr vom Gruppenfaktor abhängen als vom spezifischen Faktor. Dünne Striche: Items, die hauptsächlich auf die Gruppenfaktoren laden. In den Kästchen: Items nach Dunlap et al. (2000); ohne Item 6.

Abbildung 2. Schmid-Leiman-Lösung
