# Supplementary material for: Die NEP-Skala – hinter den (deutschen) Kulissen des Umweltbewusstseins
Source: Atypon-hosted journal article supplement (doi:10.1026/0012-1924/a000202), 2018-03-02
Supplement: 0012-1924_a000202_esm7.pdf [file 0012-1924_a000202_esm7.pdf]

Table 7. Bivariate Korrelationen der übergeordneten NEP-Faktoren mit Validitätskriterien

|                                                                                        | NEP Faktor 2. Ordnung | Schmid-Leiman Generalfaktor |
|----------------------------------------------------------------------------------------|-----------------------|-----------------------------|
| Empörung über zu geringen Schutz der Luftqualität ( $\alpha = .92$ )                   | .22**                 | .23**                       |
| Angst vor den Folgen hoher Luftverschmutzung ( $\alpha = .90$ )                        | .14**                 | .15**                       |
| Erlebte Unfairness durch eigene Autoeinschränkung ( $\alpha = .89$ )                   | .16**                 | .14**                       |
| Erlebte Fairness kommunaler Maßnahmen, die Autoverkehr einschränken ( $\alpha = .73$ ) | .09*                  | .11*                        |
| Soziale Werte ( $\alpha = .78$ )                                                       | .18**                 | .12*                        |
| Werte: Leistung und Macht ( $\alpha = .74$ )                                           | -.21**                | -.18**                      |
| Postmaterielle Werte ( $\alpha = .64$ )                                                | .12**                 | .11*                        |
| Hedonistische Werte ( $\alpha = .67$ )                                                 | -.01                  | -.01                        |
| Wert: Religiosität                                                                     | -.06                  | -.04                        |

Anmerkungen: \* $p < .05$ , \*\* $p < .01$ .
